# Supplementary material for: The organization and development of cortical interneuron presynaptic circuits are area specific
Source: PubMed Central journal article supplement — Cell Rep. Author manuscript; Available in PMC 2022 Feb 11. (PMC8832360; doi:10.1016/j.celrep.2021.109993), 2021-11-09
Supplement: NIHMS1756262-supplement-1.pdf [file NIHMS1756262-supplement-1.pdf]

**Supplemental information**

**The organization and development of cortical  
interneuron presynaptic circuits are area specific**

**Gabrielle Pouchelon, Deepanjali Dwivedi, Yannick Bollmann, Chimuanya K. Agba, Qing Xu, Andrea M.C. Mirow, Sehyun Kim, Yanjie Qiu, Elaine Sevier, Kimberly D. Ritola, Rosa Cossart, and Gord Fishell**

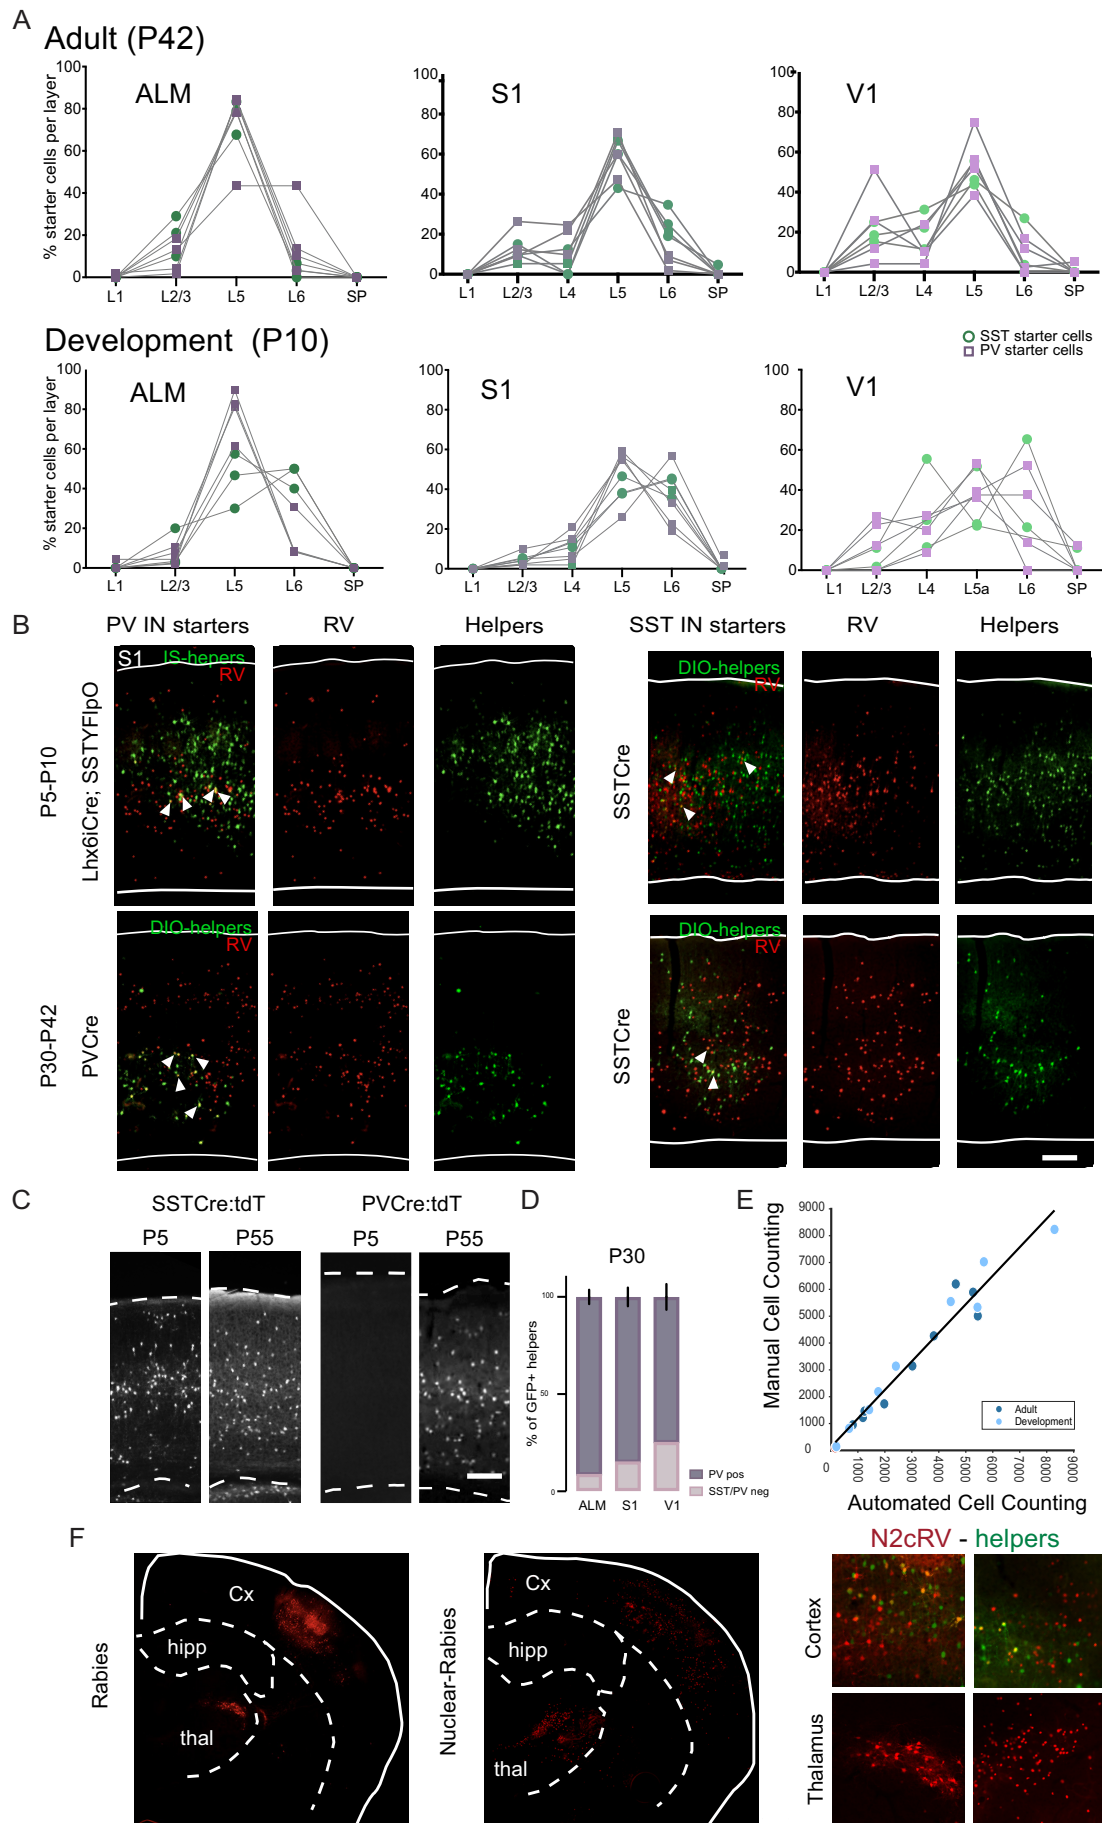

Figure S1. Monosynaptic rabies tracing method: layer distribution, normalization, Cre lines and controls.

**Figure S1: Monosynaptic rabies tracing method: layer distribution, normalization, Cre lines and controls.** Related to Figure 1

(A) Deep layer cortical distribution of the starter cells for each N, grouped per time point and area. squares = PV starter cells, circles = SST starter cells.

(B) Example of starter cells during development and adults for PV INs (Lhx6-icre; SST-flpO + AAV-IS-helpers (intersectional) and PV-cre + AAV-DIO-helpers- left) and for SST INs (SST-cre + AAV-DIO-helpers, right). Helpers are in green, Rabies (RV) are in red and starter cells are detected from the colocalization of both. (Scale bar: 100 $\mu$ m).

(C) Onset of reporter expression (tdTomato, Ai9 mouse line) upon SST-Cre and PV-cre drivers. (Scale bar: 100 $\mu$ m).

(C) The specificity of the PV cINs targeting using AAV-IS-helpers was verified for parvalbumin colocalization with AAV-IS-helpers at P30.

(E) Prediction of manual vs automated quantification using linear regression model.  $f(x) = p1 * x + p2$ .  $R^2=0.9566$ .  $p1=1.062$ ;  $p2=138.5$ .

(F) Example of retrograde-labeling tracing with mCherry vs nuclear-tdTomato reporter RV at P42 (right) (scale bar: 500 $\mu$ m). Insets: RV (red) colocalization with helpers (green) (scale bar:100 $\mu$ m).

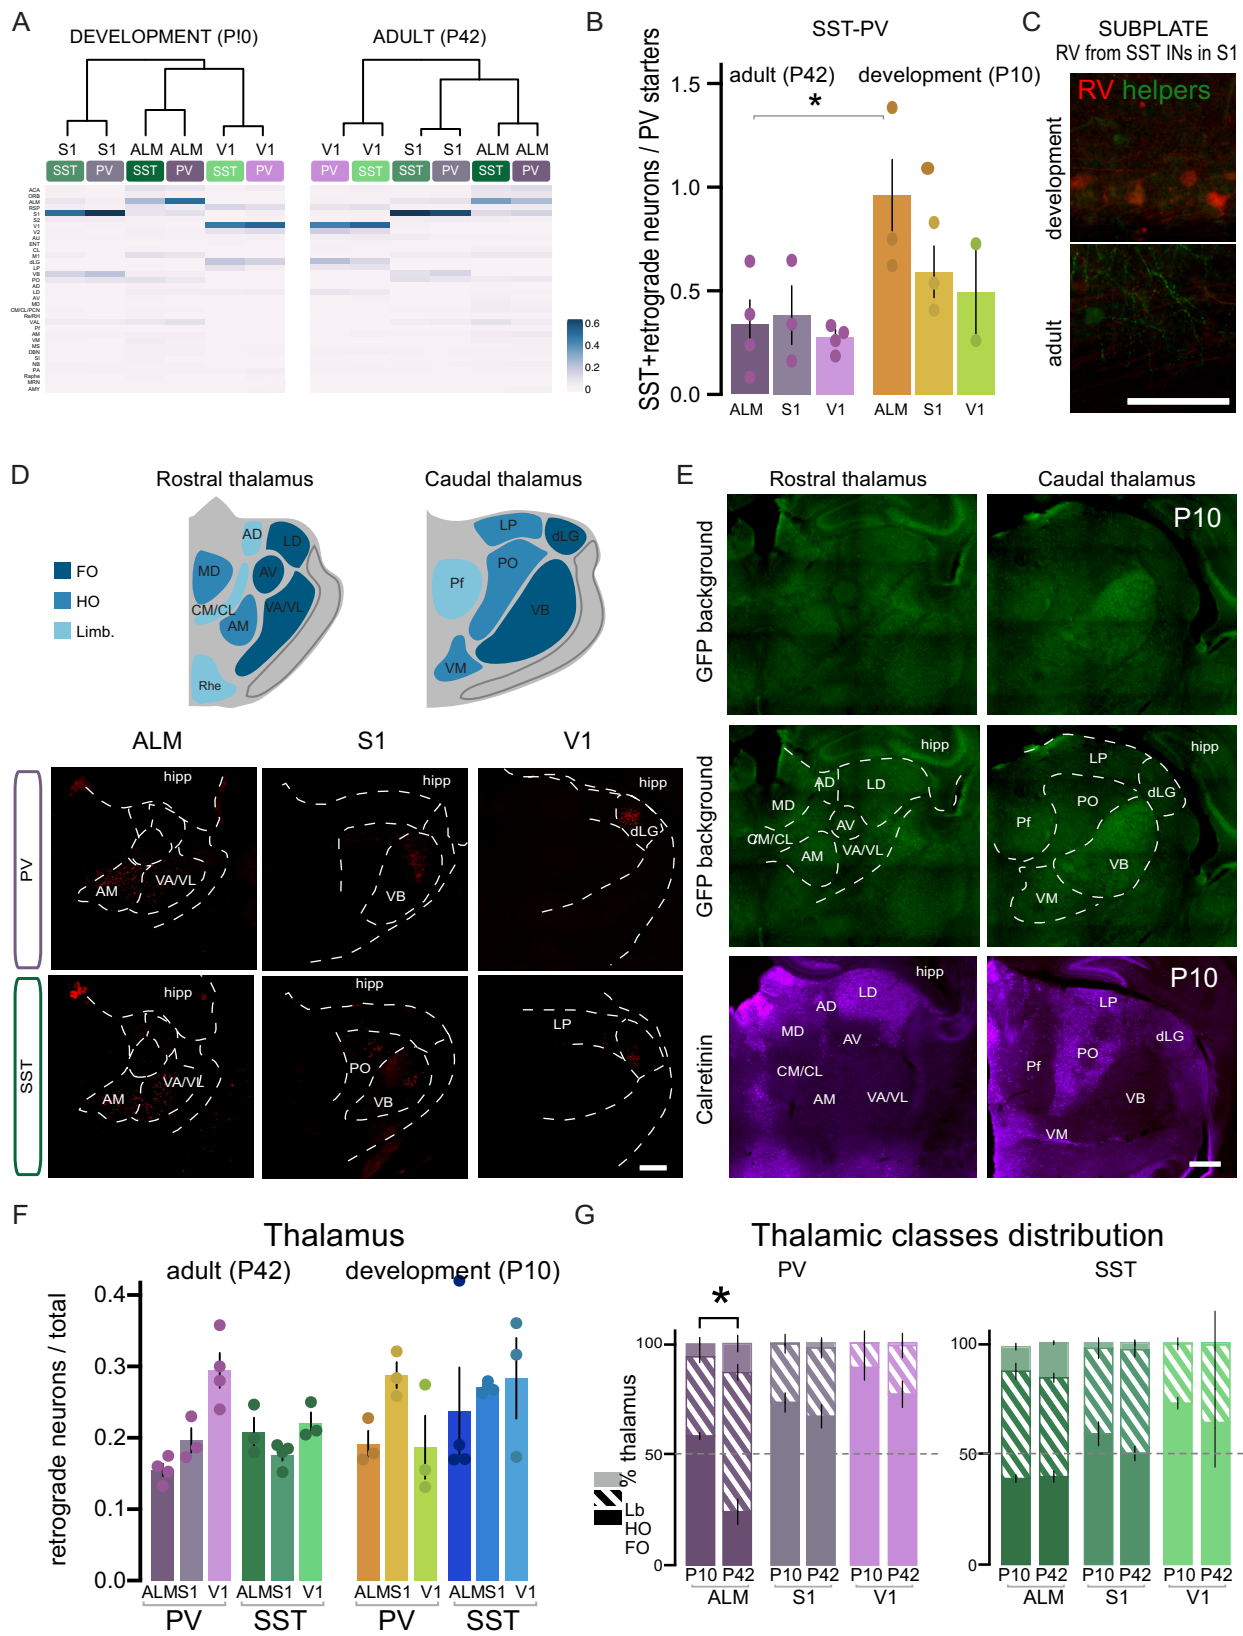

Figure S2: Temporal dynamics of afferents inputs to PV and SST INs during development

**Figure S2: Temporal dynamics of afferents inputs to PV and SST cINs during development.**  
Related to Figure 2,3

(A) Heatmap and hierarchical clustering of the degree of connectivity from all afferents during development and in adults.

(B) SST to PV cIN connectivity in all areas normalized per starter cell (PV INs) numbers, in adult and during development. (One-way ANOVA, followed by Tukey's test, adjusted  $*p=0.0104$ . Data shown are as mean  $\pm$  sem.

(C) Rabies (RV) retrograde labeling in the subplate are not starter cells as helpers (green) are not expressed both in adult and during development. The examples are the same than the one shown with CTGF in Figure 3B. (scale bar: 50 $\mu$ m)

(D) FO, HO and Lb classes identification within the thalamus. Representation of thalamic nuclei on rostral and caudal anatomical levels, as previously described. FO=dark blue, HO=blue, Lb=light blue. Example of RV tracing from PV and SST cINs in ALM, S1 and V1 in the whole thalamus in adults (scale bar: 500 $\mu$ m).

(E) Identification of thalamic nuclei in tissue using GFP background (top) and the distinct density of the thalamic nuclei (middle with labels). This was confirmed using Calretinin staining as a marker of distinct thalamic nuclei (purple, bottom). (scale bar: 500 $\mu$ m).

(F) Degree of whole thalamus connectivity to PV and SST cINs in ALM, S1 and V1 during development and in adults

(G) Ratio of FO, HO and Lb thalamocortical neurons connecting to PV and SST cINs (left). Student's t-test between PV cIN at P10 and at P42  $*p=0.0247$ , others are n.s.

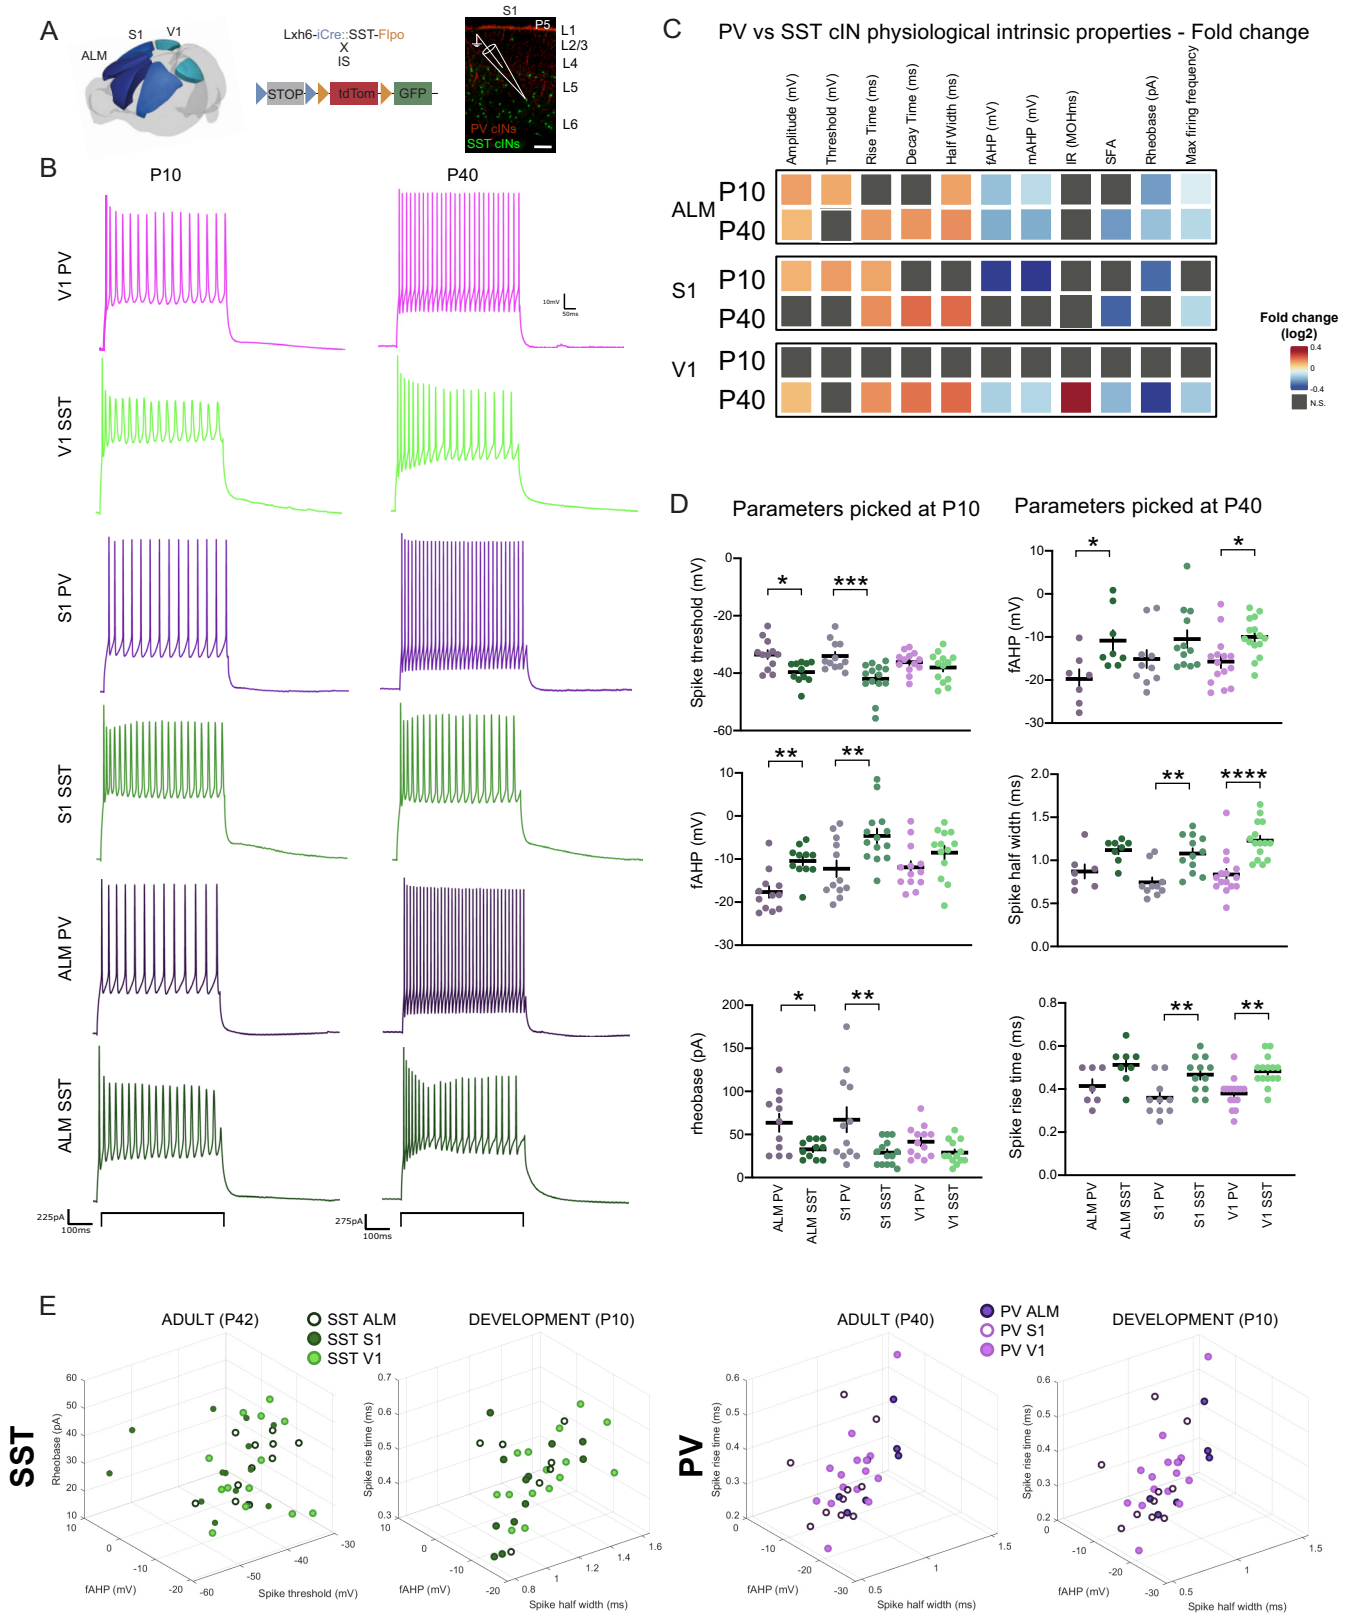

Figure S3: Intrinsic properties of PV and SST cINs during development

**Figure S3: Intrinsic properties of PV and SST cINs during development.** Related to Figure 4

(A) Strategy design: PV and SST cINs are recorded within ALM, S1 and V1 during development and adult (P10-P40). They are labeled using Lhx6iCre:SSTFlpO driver mice crossed with the IS reporter mouse line

(B) Example of electrophysiological trace of patch clamp recording from PV and SST cINs at P10 and P40 in V1, S1 and ALM.

(C) Heatmap of log<sub>2</sub>(fold change) from Sidák's multiple comparison test between PV and SST cINs average features within each area at P10 and P40.

(D) Plots of all cells for the parameters selected for the 3D plots I Figure 4. Sidák's test at P10 spike threshold \* $p=0.019$  in ALM, \*\*\* $p=0.0003$  in S1, fAHP \*\* $p=0.0079$  in ALM, \*\* $p=0.0022$  in S1, rheobase \* $p=0.0279$  in ALM, \*\* $p=0.0019$  in S1; at P40 fAHP \* $p=0.0191$  in ALM, \* $p=0.0369$  in V1, spike half width \*\* $p=0.0015$  in S1, \*\*\*\* $p<0.0001$  in V1, spike rise time \*\* $p=0.0062$  in S1, \*\* $p=0.0016$  in V1.

(E) 3D plot of PV versus SST cINs within ALM, S1 and V1 during development and in adults using the most significant features at P10 and P40.

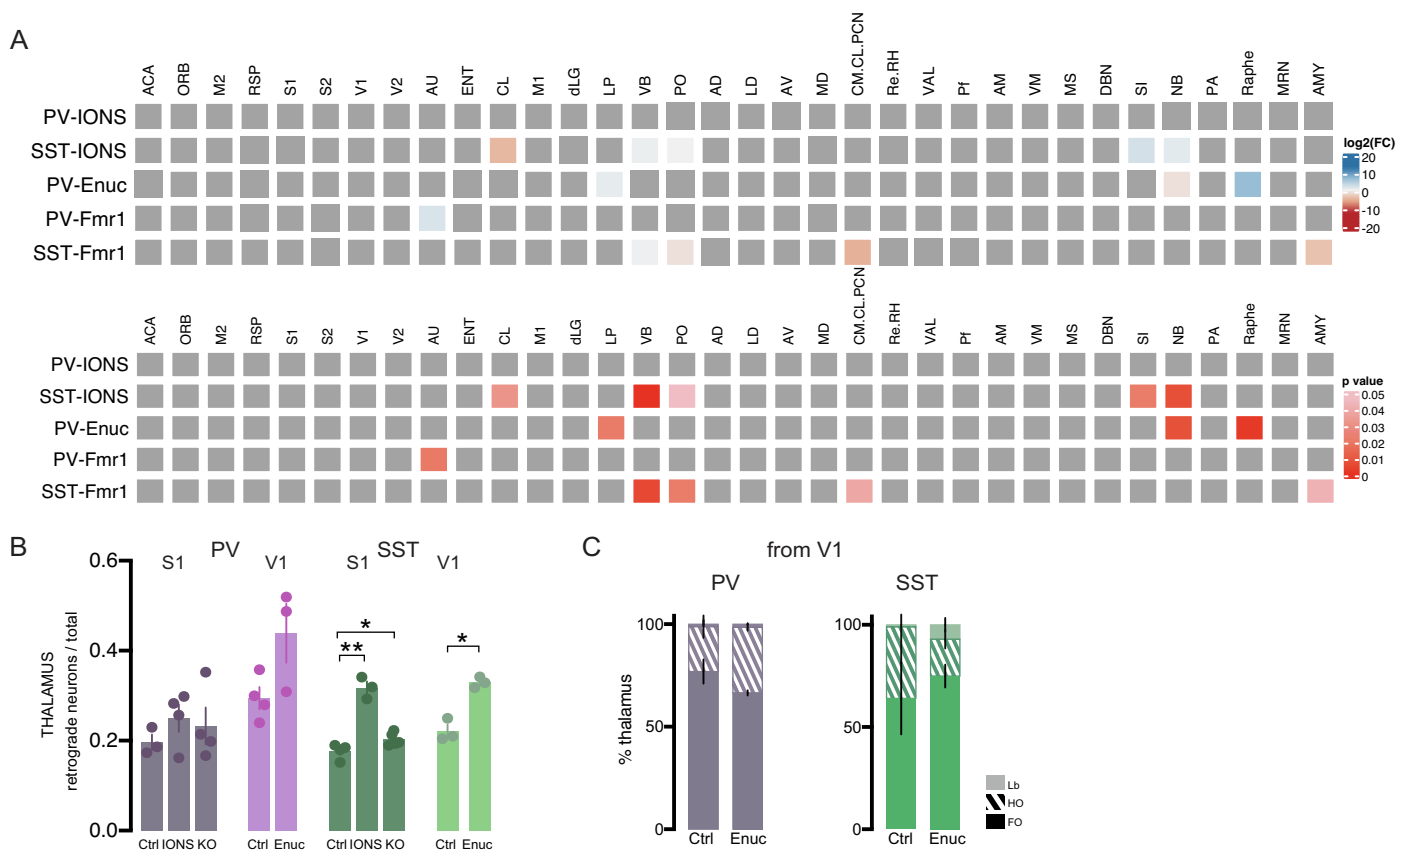

Figure S4: Connectivity from all afferents in Fmr1 KO and in sensory deprived animals



**Figure S4: Connectivity from all afferents in Fmr1 KO and in sensory deprived animals.**

Related to Figure 5

(A) Heatmap of  $\log_2(\text{Fold change})$  and  $p$  values from Student's t-test between all afferents from PV and SST cINs in ENUC, IONS or Fmr1 KO animals and their respective controls.

(B) Degree of connectivity of whole thalamus to PV and SST cINs in IONS, ENUC and Fmr1 KO animals compared to S1 controls and in ENUC compared to V1 controls.

(C) Ratio of FO, HO and Lb thalamic within the whole thalamus (100%). Student's t-test with no ratio being significant.

**Table S1:** All raw numbers of starter cells used in the study. Related to Figure 1

| IN  | area | N  | Ad  | out | Total retro | Dev | out | Total retro | IONS /Encuc | out | Total retro | KO  | out | Total retro |
|-----|------|----|-----|-----|-------------|-----|-----|-------------|-------------|-----|-------------|-----|-----|-------------|
| PV  | ALM  | N1 | 49  | 0   | 6130        | 48  | 10  | 377         | x           | x   | x           | x   | x   | x           |
| PV  | ALM  | N2 | 46  | 19  | 5648        | 13  | 0   | 101         | x           | x   | x           | x   | x   | x           |
| PV  | ALM  | N3 | 60  | 0   | 3710        | 22  | 0   | 342         | x           | x   | x           | x   | x   | x           |
| PV  | ALM  | N4 | 90  | 32  | 10332       | x   | x   | x           | x           | x   | x           | x   | x   | x           |
| PV  | S1   | N1 | 53  | 0   | 1865        | 81  | 2   | 2207        | 152         | 0   | 7650        | 106 | 0   | 8254        |
| PV  | S1   | N2 | 154 | 0   | 6846        | 80  | 0   | 1524        | 13          | 0   | 530         | 19  | 0   | 10760       |
| PV  | S1   | N3 | 55  | 0   | 4367        | 53  | 0   | 981         | 20          | 0   | 1630        | 54  | 0   | 2183        |
| PV  | S1   | N4 | x   | x   | x           | x   | x   | x           | 39          | 0   | 315         | 86  | 0   | 4721        |
| PV  | V1   | N1 | 39  | 0   | 1296        | 8   | 0   | 58          | 68          | 5   | 1227        | x   | x   | x           |
| PV  | V1   | N2 | 25  | 0   | 874         | 22  | 0   | 827         | 107         | 1   | 2187        | x   | x   | x           |
| PV  | V1   | N3 | 24  | 0   | 1465        | 23  | 2   | 145         | 33          | 0   | 2302        | x   | x   | x           |
| PV  | V1   | N4 | 43  | 1   | 2795        | x   | x   | x           | x           | x   | x           | x   | x   | x           |
| SST | ALM  | N1 | 62  | 0   | 6952        | 218 | 64  | 14937       | x           | x   | x           | x   | x   | x           |
| SST | ALM  | N2 | 19  | 0   | 1587        | 10  | 0   | 750         | x           | x   | x           | x   | x   | x           |
| SST | ALM  | N3 | 36  | 6   | 6797        | 120 | 20  | 9347        | x           | x   | x           | x   | x   | x           |
| SST | ALM  | N4 | x   | x   | x           | 40  | 5   | 6247        | x           | x   | x           | x   | x   | x           |
| SST | S1   | N1 | 19  | 0   | 4425        | 158 | 0   | 8439        | 127         | 0   | 666         | 103 | 0   | 465         |
| SST | S1   | N2 | 20  | 0   | 1475        | 55  | 4   | 5738        | 44          | 0   | 252         | 103 | 0   | 3607        |
| SST | S1   | N3 | 21  | 0   | 4657        | 101 | 3   | 7239        | 11          | 0   | 980         | 80  | 0   | 2424        |
| SST | S1   | N4 | 72  | 0   | 8595        | 98  | 3   | 5798        | x           | x   | x           | 62  | 0   | 628         |
| SST | S1   | N5 | x   | x   | x           | x   | x   | x           | x           | x   | x           | 20  | 0   | 311         |
| SST | V1   | N1 | 26  | 0   | 2999        | 9   | 0   | 474         | 89          | 2   | 1255        | x   | x   | x           |
| SST | V1   | N2 | 27  | 0   | 2609        | 52  | 0   | 3274        | 185         | 0   | 1850        | x   | x   | x           |
| SST | V1   | N3 | 16  | 0   | 964         | 56  | 0   | 3124        | 58          | 8   | 1392        | x   | x   | x           |

Adult = Ad, Development= Dev, out = cell outside of the main area found in neighboring area, KO = Fmr1 KOs, IONS = animals after infraorbital nerve section, Encuc = animals after enucleation. Total retro = total number of retrogradely labeled cells.

**Table S2:** All intrinsic physiological properties recorded from PV and SST cINs in ALM, S1 and V1 during development (P10) and in adults (P40). Related to Figure 4

|                            | Amplitude<br>(mV) | Threshold<br>(mV) | Rise Time<br>(ms) | Decay<br>Time<br>(ms) | Half width<br>(ms) | fAHP<br>(mV)    | mAHP<br>(mV)    | IR<br>(MOhms)    | SFA           | Rheobase<br>(pA) | Max firing<br>frequency |
|----------------------------|-------------------|-------------------|-------------------|-----------------------|--------------------|-----------------|-----------------|------------------|---------------|------------------|-------------------------|
| <b>ALM<br/>PV<br/>P10</b>  | 71.70<br>±4.08    | -33.51<br>±1.53   | 0.64<br>±0.03     | 2.84<br>±0.11         | 1.80<br>±0.06      | -17.64<br>±1.35 | -18.97<br>±1.59 | 479.09<br>±55.86 | 0.71<br>±0.05 | 63.64<br>±10.51  | 42.36<br>±1.98          |
| <b>S1<br/>PV P10</b>       | 72.22<br>±3.20    | -34.02<br>±1.45   | 0.59<br>±0.03     | 3.05<br>±0.36         | 2.10<br>±0.19      | -12.26<br>±1.94 | -14.51<br>±2.09 | 446.75<br>±58.38 | 0.49<br>±0.05 | 67.08<br>±14.58  | 33.17<br>±2.58          |
| <b>V1<br/>PV P10</b>       | 72.90<br>±4.38    | -36.16<br>±1.01   | 0.75<br>±0.05     | 3.45<br>±0.21         | 2.29<br>±0.10      | -11.92<br>±1.43 | -14.68<br>±1.77 | 622<br>±70.08    | 0.63<br>±0.05 | 41.54<br>±4.98   | 32.46<br>±1.90          |
| <b>ALM<br/>SST<br/>P10</b> | 87.52<br>±2.63    | -39.63<br>±1.12   | 0.70<br>±0.03     | 3.06<br>±0.29         | 2.17<br>±0.13      | -10.46<br>±1.10 | -12.85<br>±1.23 | 563.36±<br>52.37 | 0.62<br>±0.04 | 32.73<br>±3.12   | 32.91<br>±1.36          |
| <b>S1<br/>SST<br/>P10</b>  | 82.57<br>±2.52    | -41.96<br>±1.55   | 0.71<br>±0.03     | 2.82<br>±0.14         | 2.20<br>±0.09      | -4.60<br>±1.7   | -5.34<br>±1.60  | 548.07<br>±57.31 | 0.41<br>±0.05 | 28.93<br>±3.82   | 31.14<br>±1.35          |
| <b>V1<br/>SST<br/>P10</b>  | 80.59<br>±2.04    | -38.03<br>±1.42   | 0.74<br>±0.03     | 3.38<br>±0.16         | 2.45<br>±0.09      | -8.51<br>±1.56  | -11.06<br>±2.20 | 734.23<br>±91.84 | 0.55<br>±0.05 | 28.85<br>±3.72   | 33.38<br>±3.65          |
| <b>ALM<br/>PV P40</b>      | 77.89<br>±1.99    | -39.67<br>±1.35   | 0.41<br>±0.03     | 0.99<br>±0.09         | 0.87<br>±0.08      | -19.74<br>±2.24 | -13.29<br>±1.42 | 379.57<br>±51.77 | 0.73<br>±0.09 | 78.57<br>±10.10  | 91.67<br>±10.02         |
| <b>S1<br/>PV P40</b>       | 78.74<br>±2.97    | -40.30<br>±2.12   | 0.36<br>±0.03     | 0.85<br>±0.07         | 0.74<br>±0.06      | -15.12<br>±2.11 | -9.67<br>±1.84  | 225.60<br>±30.91 | 0.78<br>±0.07 | 90<br>±14.53     | 120<br>±8.25            |
| <b>V1<br/>PV P40</b>       | 73.55<br>±2.98    | -41.42<br>±1.37   | 0.38<br>±0.02     | 1.01<br>±0.09         | 0.84<br>±0.07      | -15.70<br>±1.73 | -11.48<br>±1.30 | 227.33<br>±16.90 | 0.76<br>±0.07 | 128.85<br>±11.96 | 86.33<br>±10.27         |
| <b>ALM<br/>SST<br/>P40</b> | 86.72<br>±2.70    | -44.08<br>±2.67   | 0.51<br>±0.03     | 1.26<br>±0.06         | 1.12<br>±0.05      | -10.84<br>±2.43 | -7.29<br>±2.02  | 475.14<br>±95.49 | 0.37<br>±0.05 | 46.88<br>±5.66   | 61<br>±6.79             |
| <b>S1<br/>SST<br/>P40</b>  | 78.21<br>±1.95    | -42.79<br>±1.85   | 0.46<br>±0.03     | 1.24<br>±0.08         | 1.08<br>±0.07      | -10.34<br>±2.27 | -8.36<br>±1.61  | 308.50<br>±43.63 | 0.33<br>±0.03 | 75<br>±11.18     | 80<br>±8.07             |
| <b>V1<br/>SST<br/>P40</b>  | 81.22<br>±2.39    | -41.18<br>±1.17   | 0.48<br>±0.02     | 1.43<br>±0.07         | 1.23<br>±0.06      | -10<br>±1.15    | -7.56<br>±1.21  | 471.08<br>±41.01 | 0.43<br>±0.04 | 48.33<br>±5.16   | 53.14<br>±7.46          |

Data represented as mean ± sem
